1           **Expressional artifact caused by a co-injection marker *rol-6* in *C. elegans***

2

3           **Short title: Co-injection marker-induced artifactual expression**

4

5

6           HoYong Jin<sup>1</sup>, Scott W. Emmons<sup>2</sup>, and Byunghyuk Kim<sup>1</sup>

7

8           <sup>1</sup>Department of Life Science, Dongguk University-Seoul, Goyang, Republic of Korea

9           <sup>2</sup>Department of Genetics and Dominick P. Purpura Department of Neuroscience, Albert

10          Einstein College of Medicine, Bronx, New York, USA

11

12

13          Correspondence:

14          Byunghyuk Kim ([bkim12@dongguk.edu](mailto:bkim12@dongguk.edu))

15          Scott W. Emmons ([scott.emmons@einstein.yu.edu](mailto:scott.emmons@einstein.yu.edu))

16

17 **ABSTRACT**

18 In transgenic research, selection markers have greatly facilitated the generation of transgenic  
19 animals. A prerequisite for a suitable selection marker to be used along with a test gene of  
20 interest is that the marker should not affect the phenotype of interest in transformed animals.  
21 One of the most common selection markers used in *C. elegans* transgenic approaches is the  
22 *rol-6* co-injection marker, which induces a behavioral roller phenotype due to a cuticle defect  
23 but is not known to have other side effects. However, we found that the *rol-6* co-injection  
24 marker can cause expression of GFP in the test sequence in a male-specific interneuron called  
25 CP09. We found that the *rol-6* gene sequence included in the marker plasmid is responsible for  
26 this unwanted expression. Accordingly, the use of the *rol-6* co-injection marker is not  
27 recommended when researchers intend to examine precise expression or perform functional  
28 studies especially targeting male *C. elegans* neurons. The *rol-6* sequence region we identified  
29 can be used to drive a specific expression in CP09 neuron for future research.

30

## 31 INTRODUCTION

32 Efficient transgenic techniques are used in various model systems to detect gene expression  
33 and assess genetic function. In the nematode *Caenorhabditis elegans*, for example, gene  
34 expression can be monitored using transgenic worms generated by a simple, gonadal  
35 microinjection of a plasmid that drives GFP expression under the control of a promoter for a  
36 gene of interest [1]. During the course of the DNA transformation procedure, one easy way to  
37 select transformed animals is by using easily-detected co-injection markers. In *C. elegans*,  
38 several co-injection markers are commonly used, which include visible fluorescent markers  
39 (e.g. *ttx-3p::GFP*, *myo-2p::mCherry*) [2, 3] and rescuing markers that restore lethal or non-  
40 lethal phenotypes (e.g. *pha-1*, *unc-119*, *dpy-5*) [4–6]. One type of dominant selectable marker,  
41 *rol-6(su1006)*, is widely used, because it shows a dominant roller phenotype that is easily  
42 observed and can be used in a wild type background [7, 8].

43 A prerequisite for the use of co-injection markers is that the phenotype induced by the  
44 co-injection marker must not interfere with expression or scoring of the gene being tested. In  
45 this study, we report that the widely-used *rol-6* marker unexpectedly activates the test gene in  
46 a male interneuron called CP09 in *C. elegans*. This unwanted expression could potentially  
47 result in misidentification of cell types in a gene expression study as well as affect the results  
48 of functional studies that utilize *rol-6* as a co-injection marker.

49

## 50 RESULTS AND DISCUSSION

51 During the course of experiments to determine the tissue-specific expression pattern of 10  
52 putative synaptic genes in *C. elegans*, we generated transgenic worms with promoter::GFP test  
53 genes using *rol-6(su1006)* as a co-injection marker. We noticed that in eight out of 10  
54 transgenic lines, GFP was expressed in the CP09 neuron among other diverse neurons [9].  
55 CP09 is a male-specific interneuron located in the pre-anal ganglion of the male tail that forms  
56 chemical and electrical synapses with many other male-specific or sex-shared neurons (Fig 1).  
57 Male *C. elegans* have 10 CP ventral cord neurons (CP00~CP09) [10]. The CP neurons are  
58 believed to have similar properties due to a similar developmental origin, in which all CPs are  
59 generated from Pn.aapp cells, but some CP neurons are reported to use different  
60 neurotransmitters [10–13]. Interestingly, out of the eight transgenic lines showing CP09  
61 expression, four of the transgenes were expressed in most or many neurons (i.e. many CP  
62 neurons), but the other four were expressed exclusively in CP09 among the 10 CP neurons.  
63 Therefore, we suspected that the CP09 expression may be an expression artifact.

64 It is widely known that GFP reporters driven by diverse promoters often show artificial  
65 fluorescence in posterior gut cells, in several muscle cells, and even in one neuron called PVT  
66 [14, 15]. One potential cause of these artifacts was suggested to be an effect of the *unc-54* 3'  
67 UTR, which is attached to the GFP coding sequence in most *C. elegans* vectors [15]. To test  
68 whether the *unc-54* 3' UTR can also cause expression in CP09, we replaced the *unc-54* 3' UTR  
69 with the *let-858* 3' UTR in a promoter::GFP fusion for one of the test genes that showed  
70 exclusive expression in CP09 among the 10 CP neurons (*T19A6.4* gene). When transgenic  
71 animals were generated by microinjection of the *T19A6.4p::GFP::let-858* 3' UTR fusion along  
72 with the *rol-6* co-injection marker, they still showed CP09 expression, suggesting that at least

73 for this gene factors other than the *unc-54* 3' UTR are likely involved in the generation of the  
74 CP09 signal (data not shown).

75 The second possibility was that the *rol-6* co-injection marker used in the  
76 microinjection procedure caused the expression in CP09. To test this idea, we injected an empty  
77 GFP vector (pPD95.75), which contains no promoter for the GFP coding sequence, together  
78 with the *rol-6* co-injection marker (pRF4). The resulting transgenic animal showed a robust  
79 GFP expression in CP09 (Fig 2A). However, when the empty GFP vector was injected with  
80 another co-injection marker *ttx-3p::GFP* (expressed in AIY neuron in the head), the CP09  
81 signal was not observed (Fig 2B). Thus, the *rol-6* co-injection marker itself can promote  
82 transcription in the CP09 neuron.

83 Homologous recombination between co-injected DNA molecules contributes to the  
84 formation of stable extrachromosomal arrays [8]. Most *C. elegans* vectors have a backbone  
85 based on the pUC19 plasmid, and thus have high sequence similarities that are potentially  
86 utilized for homologous recombination during extrachromosomal arrays formation. For  
87 example, the pRF4 and pPD95.75 plasmids share ~2.5 kb sequences that include the *E.coli*  
88 ampicillin resistance gene and origin of replication. We also found a 40 bp homology shared  
89 between the pRF4 plasmid and GFP constructs generated by promoter::GFP fusion PCR, which  
90 constitutes the multiple cloning site of the vectors (minimum homology with GFP constructs)  
91 (Fig 3A). The full sequence information of pRF4 is available in S1 Text. (Although pRF4 has  
92 been used widely in the *C. elegans* research community, the accurate pRF4 sequence, to our  
93 knowledge, is not yet available in public.)

94 To find a region responsible for CP09 expression, we divided the pRF4 plasmid into  
95 two fragments, namely “*rol-6*” and “vector” fragments, and cloned these into the empty GFP  
96 vector pPD95.75. When the *rol-6 fragment::GFP* was injected, the resulting transgenic animal

97 showed a robust GFP expression in CP09 (Fig 3B). However, we could not observe any GFP  
98 expression in CP09 when the *vector fragment::GFP* was used for injection (Fig 3B). Therefore,  
99 it is likely that when a GFP construct is injected together with the *rol-6* co-injection marker  
100 pRF4, the *rol-6* fragment fused to GFP by homologous recombination generates unwanted  
101 transcription and GFP expression in CP09 (Fig 3C).

102 Our results raise an obvious problem in using the *rol-6* co-injection marker for gene  
103 expression or functional studies especially on the *C. elegans* male, as this marker can induce  
104 unwanted expression in the male CP09 neuron. The *rol-6* fragment of pRF4 likely contains a  
105 driver sequence that triggers CP09 expression. For expression studies using the *rol-6* co-  
106 injection marker, any CP09 expression needs to be double-checked by using another type of  
107 co-injection marker. For functional studies, it should be determined whether the use of the *rol-6*  
108 marker affected interpretation of the results. For example, techniques called GRASP (GFP  
109 reconstitution across synaptic partners) and iBLINC (in vivo biotin labelling of intercellular  
110 contacts) have been developed to visualize synapses formed between specific pairs of neurons  
111 that are defined by cell-specific drivers [16, 17]. Since CP09 has many synaptic connections  
112 with other male-specific and sex-shared neurons (see Fig 1), artifactual expression in CP09 can  
113 potentially generate additional synapse signal when using GRASP or iBLINC. We recommend  
114 not using the *rol-6* marker if studies are designed to examine gene expression or function in  
115 the male tail of *C. elegans*.

116 To avoid the unwanted CP09 expression, homologous recombination between the *rol-*  
117 *6* co-injection marker and any expression constructs may be minimized by reducing their  
118 sequence homologies. For example, fusion PCR-based promoter::GFP constructs share a  
119 minimum 40 bp homology with the pRF4 plasmid. If a promoter::GFP construct is designed to  
120 omit the homologous sequences, it may be possible to suppress CP09 expression caused by the

121 *rol-6* co-injection marker. However, it will be difficult to test this idea using plasmid-based  
122 GFP constructs, as most *C. elegans* plasmids share a backbone and usually have a high  
123 sequence homology [15].

124 Cell-specific promoters or drivers are invaluable tools for transgenic research, because  
125 they allow us to confine gene expression to subsets of cells or even to a specific cell. Several  
126 such drivers have been identified and used extensively in the *C. elegans* community [18]. In  
127 this study, we identified that the *rol-6* fragment of pRF4 drives expression in the male-specific  
128 CP09 neuron. This sequence can be used as a CP09-specific driver for future research.

## 129 MATERIALS AND METHODS

130

### 131 *C.elegans* maintenance

132 CB4088 *him-5(e1490)* worms were used as the wild-type reference strain to generate worm  
133 populations containing large numbers of males. Worms were grown at 20°C on standard  
134 nematode growth media (NGM) plates with OP50 *E. coli* as a food source and maintained  
135 according to standard methods [19].

136

### 137 Transgenic strains and molecular cloning

138 To obtain transgenic worms, plasmids or fusion PCR products [20] were injected into *him-*  
139 *5(e1490)* worms at ~50 ng/μl with co-injection marker pRF4 (*rol-6(su1006)*) or *ttx-3p::GFP*  
140 at 50 ng/μl.

141 *T19A6.4p::GFP::let-858 3' UTR* fusion was obtained by a PCR-fusion method [20].

142 *T19A6.4p* was PCR-amplified from N2 worms as described previously [9] and then fused to  
143 *GFP::let-858 3' UTR* amplified from pPD135.02 vector (a gift from Andrew Fire) to generate  
144 *T19A6.4p::GFP::let-858 3' UTR* PCR fragment.

145 To generate *rol-6 fragment::GFP*, the *rol-6* fragment (4,065 bp) was PCR-amplified  
146 from pRF4 with restriction sites of SphI and XmaI (primer F: 5'- AAAGGCATGC  
147 ttatcatcttcggttttgataaa-3' and primer R: 5'- AACCCCGGG gtattcaagcaggagaagc-3'). This  
148 PCR product was digested and ligated into SphI/XmaI-digested pPD95.75 vector.

149 To generate *vector fragment::GFP*, the vector fragment (3,144 bp) was PCR-amplified  
150 from pRF4 with restriction sites of SphI and XmaI (primer F: 5'- GGGGGCATGC  
151 gccctatagtgagtcgtatt-3' and primer R: 5'- AACCCCGGG ttgttccttttagtgaggg-3'). This PCR  
152 product was digested and ligated into SphI/XmaI-digested pPD95.75 vector.



153

154 **Microscopy**

155 Worms were prepared and imaged as described previously [21]. Briefly, 1-day-old males were  
156 mounted on 5% agar pads on glass slides using 10~50 mM sodium azide. Worms were  
157 observed with fluorescence microscopy (Zeiss Axio Imager.Z2) or confocal microscopy  
158 (Nikon Eclipse Ti). Images were processed using AxioVision (Zeiss) or NIS-Elements (Nikon).  
159 Figures were prepared using ImageJ software.

160

161 **ACKNOWLEDGMENTS**

162 Some strains were provided by the CGC, which is funded by NIH Office of Research  
163 Infrastructure Programs (P40 OD010440). This work was supported by the National Research  
164 Foundation of Korea (NRF) grant funded by the Korea government (MSIT)  
165 (2018R1C1B5043569) (to BK) and by the United States National Institutes of Health  
166 (R01MH112689) (to SE).

167

169 **REFERENCES**

- 170 1. Chalfie M, Tu Y, Euskirchen G, Ward WW, Prasher DC. Green fluorescent protein as a  
171 marker for gene expression. *Science*. 1994; 263: 802–805.
- 172 2. Altun-Gultekin Z, Andachi Y, Tsalik EL, Pilgrim D, Kohara Y, Hobert O. A regulatory  
173 cascade of three homeobox genes, *ceh-10*, *ttx-3* and *ceh-23*, controls cell fate specification  
174 of a defined interneuron class in *C. elegans*. *Development*. 2001;128: 1951–1969.
- 175 3. Frøkjaer-Jensen C, Davis MW, Hopkins CE, Newman BJ, Thummel JM, Olesen SP,  
176 Grunnet M, Jorgensen EM. Single-copy insertion of transgenes in *Caenorhabditis elegans*.  
177 *Nat Genet*. 2008; 40: 1375–1383.
- 178 4. Granato M, Schnabel H, Schnabel R. *pha-1*, a selectable marker for gene transfer in *C.*  
179 *elegans*. *Nucleic Acids Res*. 1994; 22: 1762–1763.
- 180 5. Praitis V, Casey E, Collar D, Austin J. Creation of low-copy integrated transgenic lines in  
181 *Caenorhabditis elegans*. *Genetics*. 2001; 157: 1217–1226.
- 182 6. Thacker C, Sheps JA, Rose AM. *Caenorhabditis elegans dpy-5* is a cuticle procollagen  
183 processed by a proprotein convertase. *Cell Mol Life Sci*. 2006; 63: 1193–1204.
- 184 7. Kramer JM, French RP, Park EC, Johnson JJ. The *Caenorhabditis elegans rol-6* gene,  
185 which interacts with the *sqt-1* collagen gene to determine organismal morphology, encodes  
186 a collagen. *Mol Cell Biol*. 1990; 10: 2081–2089.
- 187 8. Mello CC, Kramer JM, Stinchcomb D, Ambros V. Efficient gene transfer in *C.elegans*:  
188 extrachromosomal maintenance and integration of transforming sequences. *EMBO J*. 1991;  
189 10: 3959–3970.
- 190 9. Kim B, Suo B, Emmons SW. Gene Function Prediction Based on Developmental  
191 Transcriptomes of the Two Sexes in *C. elegans*. *Cell Rep*. 2016; 17: 917–928.
- 192 10. Sulston JE, Albertson DG, Thomson JN. The *Caenorhabditis elegans* male: postembryonic

- 193 development of nongonadal structures. *Dev Biol.* 1980; 78: 542–576.
- 194 11. Loer CM, Kenyon CJ. Serotonin-deficient mutants and male mating behavior in the  
195 nematode *Caenorhabditis elegans*. *J Neurosci.* 1993; 13: 5407–5417.
- 196 12. Barrios A, Ghosh R, Fang C, Emmons SW, Barr MM. PDF-1 neuropeptide signaling  
197 modulates a neural circuit for mate-searching behavior in *C. elegans*. *Nat Neurosci.* 2012;  
198 15: 1675–1682.
- 199 13. Serrano-Saiz E, Pereira L, Gendrel M, Aghayeva U, Bhattacharya A, Howell K, Garcia  
200 LR, Hobert O. A Neurotransmitter Atlas of the *Caenorhabditis elegans* Male Nervous  
201 System Reveals Sexually Dimorphic Neurotransmitter Usage. *Genetics.* 2017; 206: 1251–  
202 1269.
- 203 14. Ruvinsky I, Ruvkun G. Functional tests of enhancer conservation between distantly related  
204 species. *Development.* 2003; 130: 5133–5142.
- 205 15. Boulin T, Etchberger JF, Hobert O. Reporter gene fusions. *WormBook*, ed. The *C. elegans*  
206 Research Community, *WormBook.* 2006; doi/10.1895/wormbook.1.106.1,  
207 <http://www.wormbook.org>.
- 208 16. Feinberg EH, Vanhoven MK, Bendesky A, Wang G, Fetter RD, Shen K, Bargmann CI.  
209 GFP Reconstitution Across Synaptic Partners (GRASP) defines cell contacts and synapses  
210 in living nervous systems. *Neuron.* 2008; 57: 353–363.
- 211 17. Desbois M, Cook SJ, Emmons SW, Bülow HE. Directional Trans-Synaptic Labeling of  
212 Specific Neuronal Connections in Live Animals. *Genetics.* 2015; 200: 697–705.
- 213 18. Okkema PG, Krause M. Transcriptional regulation. *WormBook*, ed. The *C. elegans*  
214 Research Community, *WormBook.* 2005; doi/10.1895/wormbook.1.45.1,  
215 <http://www.wormbook.org>.
- 216 19. Brenner S. The genetics of *Caenorhabditis elegans*. *Genetics.* 1974; 77: 71–94.

- 217 20. Hobert O. PCR fusion-based approach to create reporter gene constructs for expression  
218 analysis in transgenic *C. elegans*. *Biotechniques*. 2002; 32: 728–730.
- 219 21. Kim B, Emmons SW. Multiple conserved cell adhesion protein interactions mediate neural  
220 wiring of a sensory circuit in *C. elegans*. *Elife*. 2017; 6. pii: e29257.
- 221 22. Altun ZF, Herndon LA, Wolkow CA, Crocker C, Lints R, Hall DH. *WormAtlas*, ed. 2002–  
222 2019; <http://www.wormatlas.org>
- 223

224 **FIGURE LEGENDS**

225

226 **Fig 1. The CP09 neuron in *C. elegans*.** (A) Schematic of the position of cell body and axon  
227 of CP09 in the pre-anal ganglion of the *C. elegans* male tail. The image was adapted from  
228 WormAtlas (<https://www.wormatlas.org/>) with permission [22]. (B) A skeleton map of CP09.  
229 Dots indicate presynapses (pink), postsynapses (purple), and gap junctions (blue). Information  
230 of individual synapses is accessible at WormWiring (<http://wormwiring.org/>).

231

232 **Fig 2. The *rol-6* co-injection marker causes an expressional artifact in CP09.** GFP  
233 expression in the male tail of transgenic worms injected with an empty GFP vector (pPD95.75)  
234 along with *rol-6(su1006)* plasmid (pRF4) (A) or *ttx-3p::GFP* plasmid (B). Exclusive CP09  
235 expression was observed in seven out of 12 independent transgenic lines injected with GFP  
236 vector + pRF4 (7/12), whereas no CP09 expression was observed in 10 independent lines with  
237 GFP vector + *ttx-3p::GFP* (0/10). Asterisks indicate autofluorescence in the spicule. Scale bar,  
238 20  $\mu\text{m}$ .

239

240 **Fig 3. The *rol-6* fragment of pRF4 is responsible for CP09 expression.** (A) Schematic of  
241 cloning procedure to identify a region of pRF4 plasmid responsible for CP09 expression. Either  
242 *rol-6* or vector fragment was subcloned into the empty GFP vector pPD95.75 and the resulting  
243 plasmids were injected to generate transgenic worms. (B) CP09 expression was observed in all  
244 12 independent transgenic lines injected with *rol-6 fragment::GFP* (12/12), whereas no CP09  
245 expression was observed in nine independent lines with *vector fragment::GFP* (0/9). (C)  
246 Proposed model of homologous recombination between pRF4 plasmid and GFP constructs.

247

248 **SUPPORTING INFORMATION**

249

250 **S1 Text. pRF4 sequence (7,271 bp)**

# Fig 1

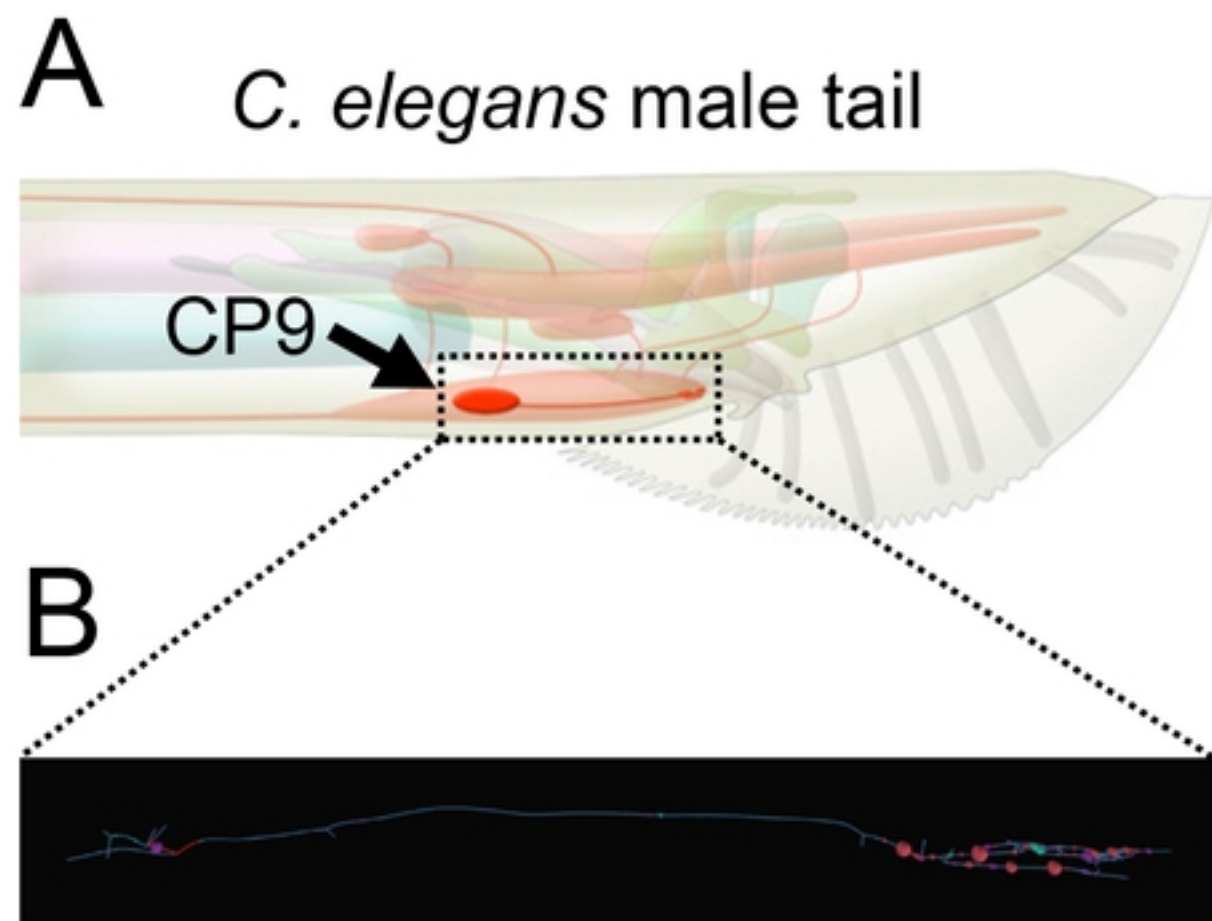

Figure1



# Fig 2

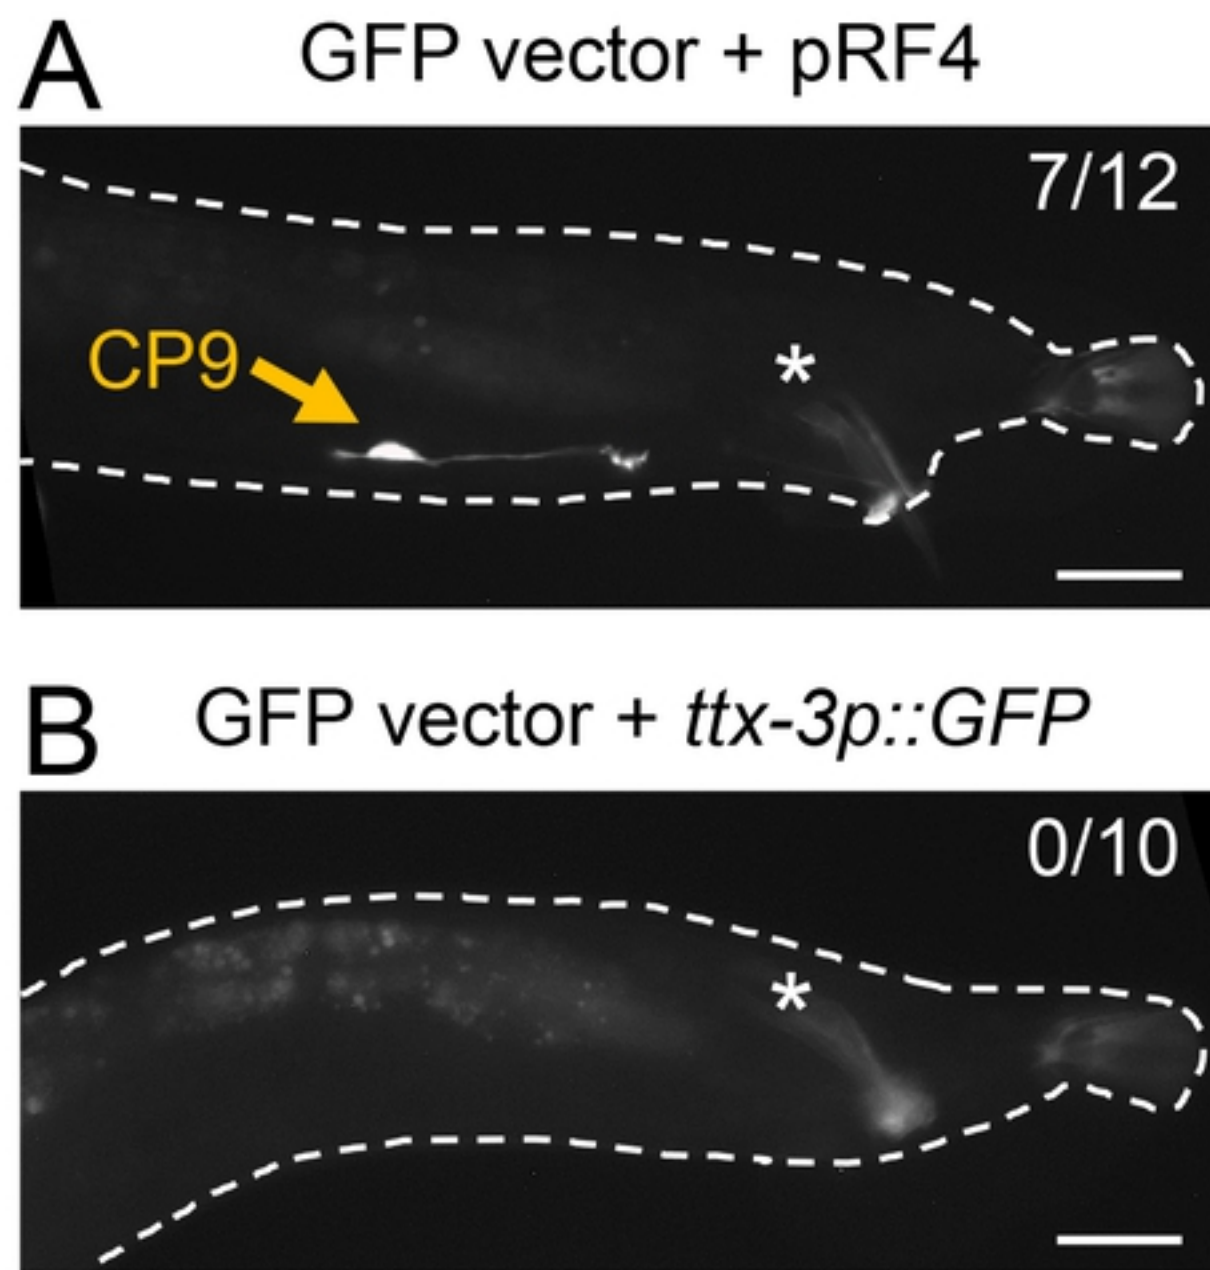

# Fig 3

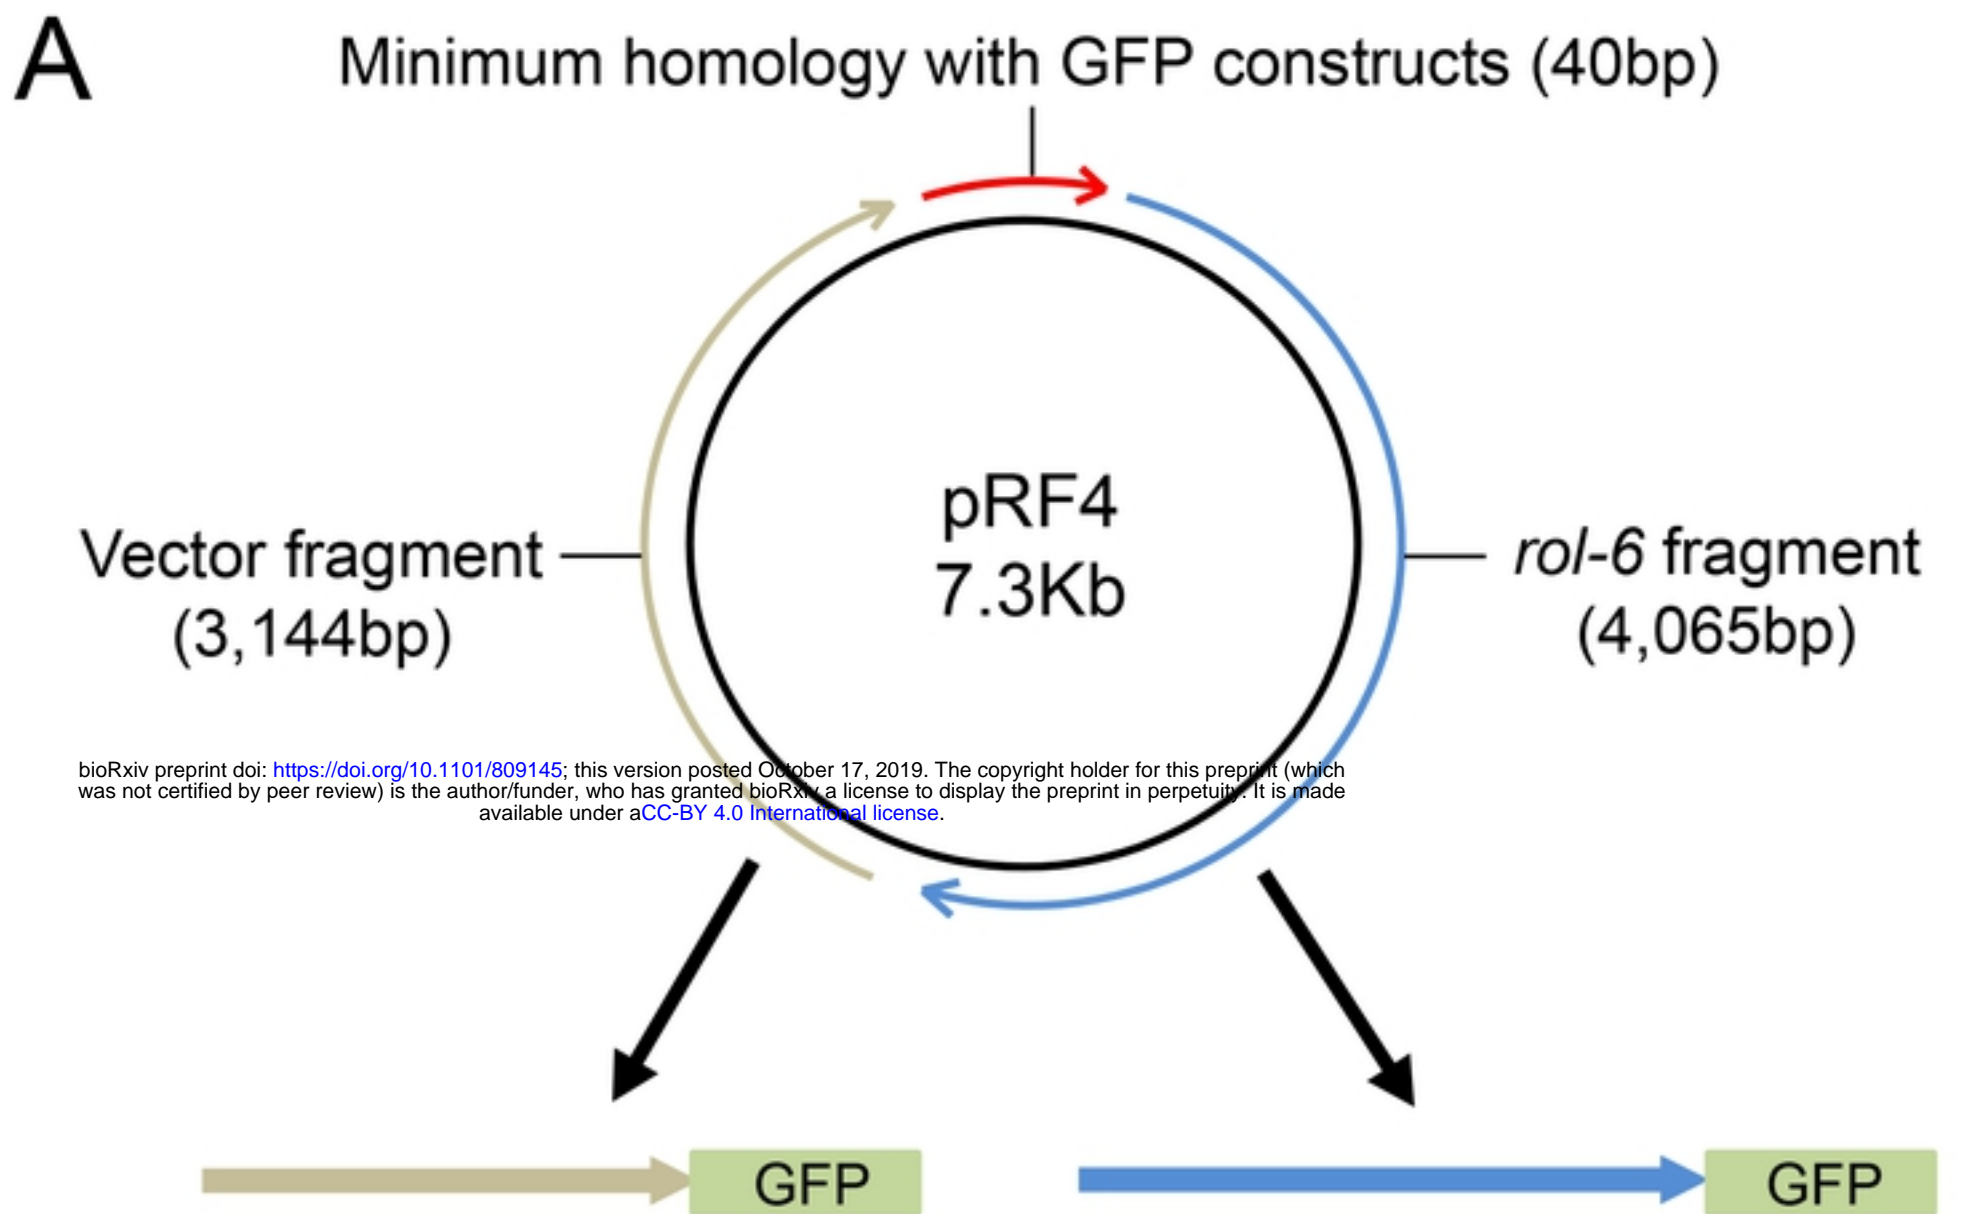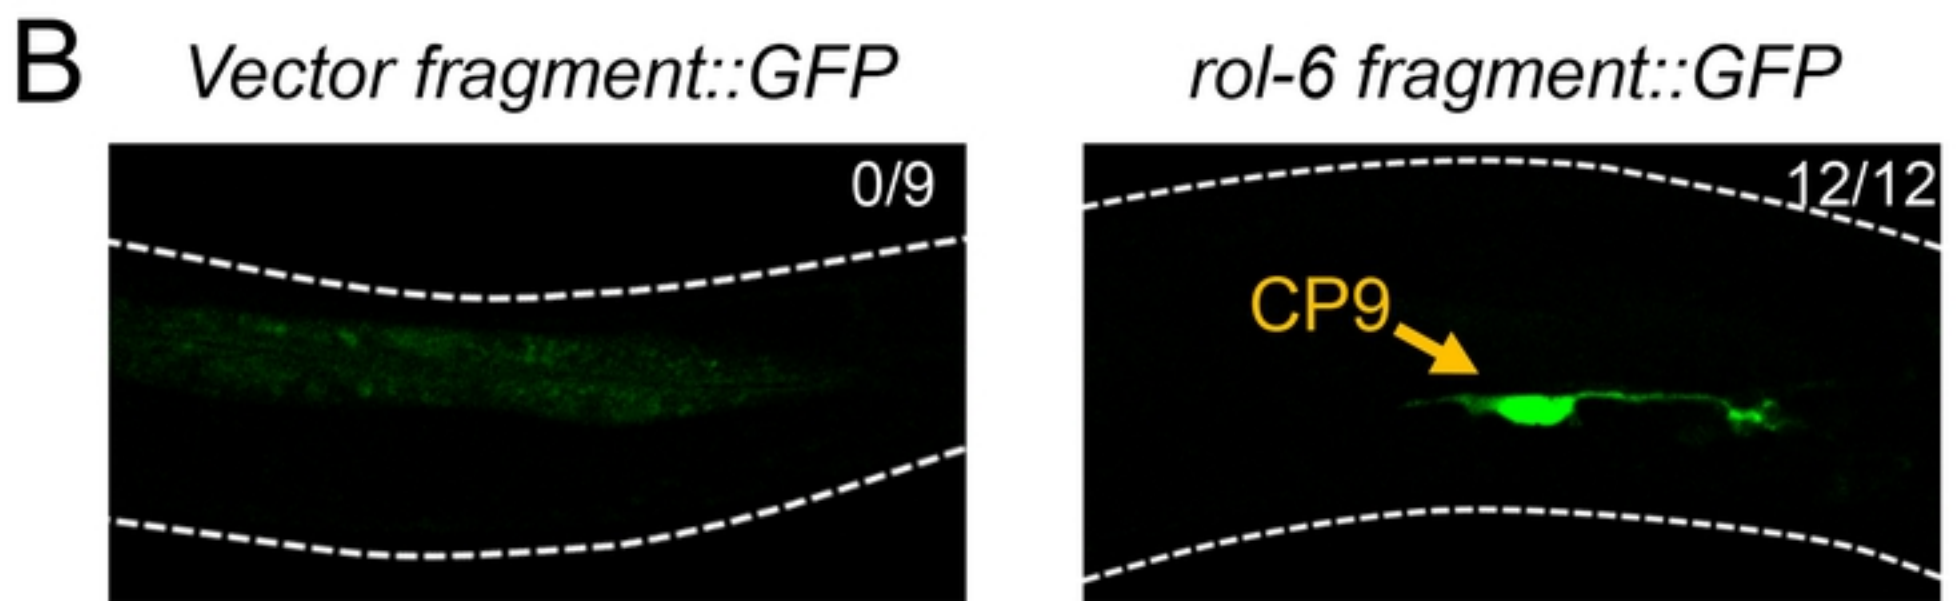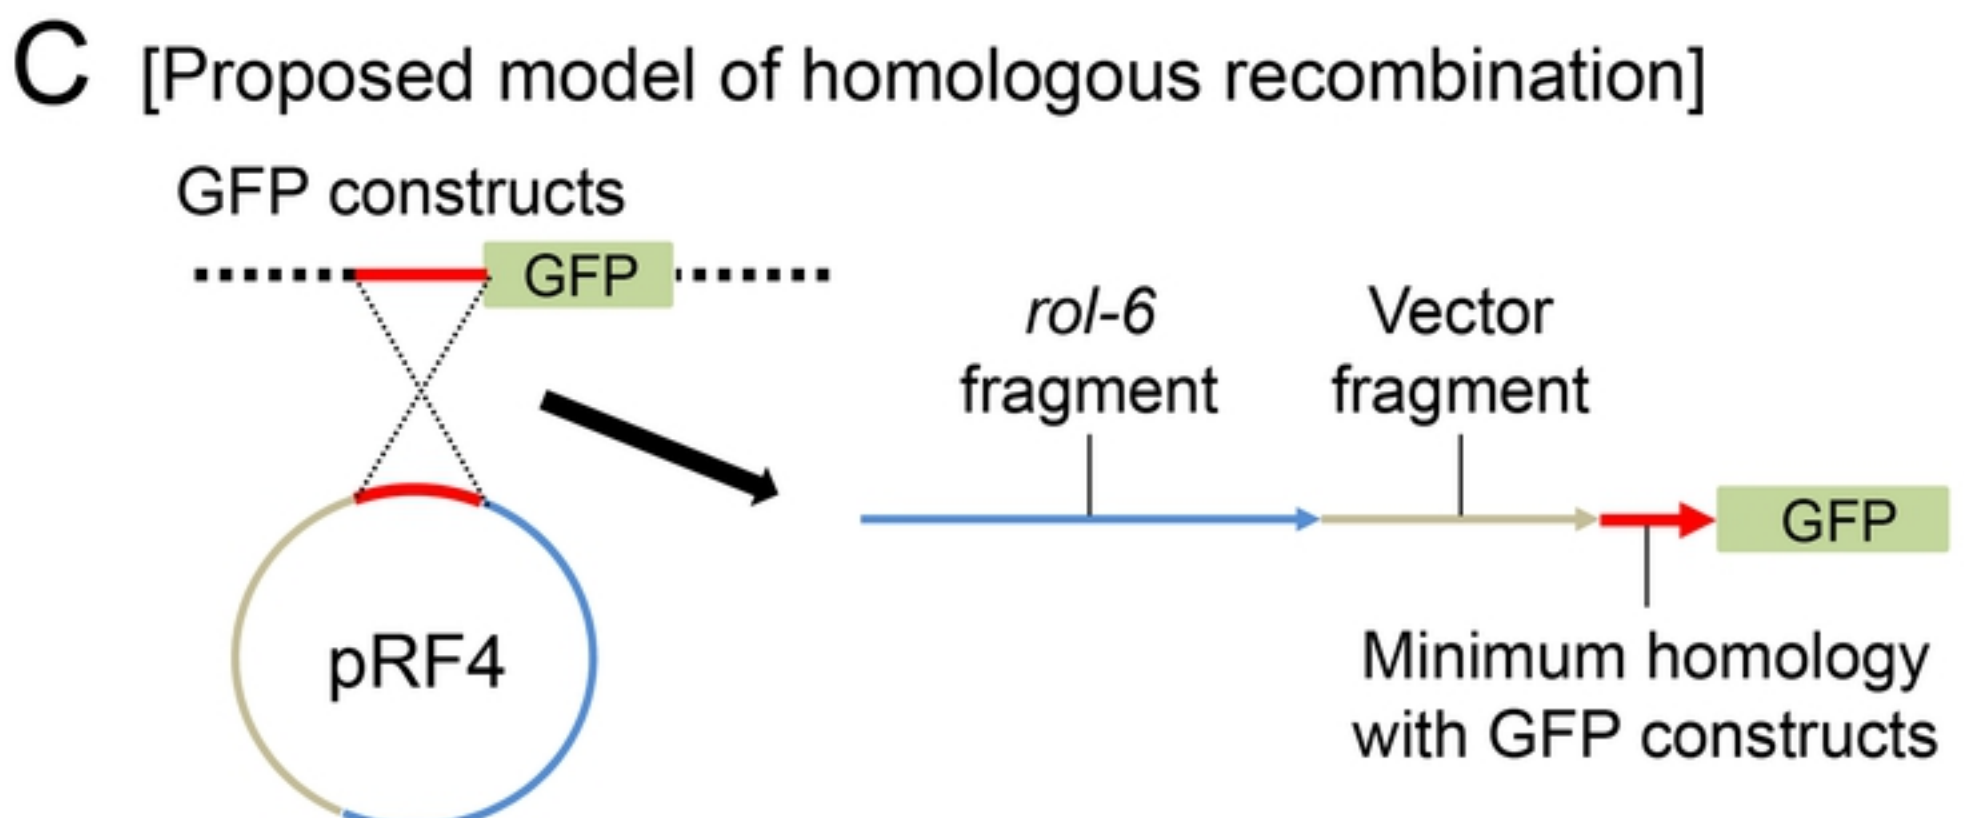

Source: https://www.biorxiv.org/content/10.1101/809145v1.full.pdf
